# Supplementary material for: Uterine glands coordinate on-time embryo implantation and impact endometrial decidualization for pregnancy success
Source: PubMed Central journal article supplement (PMC6015089; doi:10.1038/s41467-018-04848-8), 2018-06-22
Supplement: 41467_2018_4848_MOESM3_ESM.pdf [file 41467_2018_4848_MOESM3_ESM.pdf]

## Description of Additional Supplementary Files

File Name: **Supplementary Data 1**

Description: Differentially Expressed Genes in GD 4 Uteri from Control and *Pgr<sup>Cre/+</sup>Foxa2<sup>ff</sup>* Mice

File Name: **Supplementary Data 2**

Description: Differentially Expressed Genes in GD 4 uteri from Control and *Ltf<sup>Cre/+</sup>Foxa2<sup>ff</sup>* Mice

File Name: **Supplementary Data 3**

Description: Gland-enriched Genes Uniquely Differentially Expressed in uteri of *Pgr<sup>Cre/+</sup>Foxa2<sup>ff</sup>* Mice on GD 4

File Name: **Supplementary Data 4**

Description: TOPPFUN Analysis of Gland-enriched Genes Uniquely Differentially Expressed in uteri of *Pgr<sup>Cre/+</sup>Foxa2<sup>ff</sup>* Mice on GD 4

File Name: **Supplementary Data 5**

Description: Differentially Expressed Genes in GD 6 Implantation Sites from Control and LIF-Replaced *Pgr<sup>Cre/+</sup>Foxa2<sup>ff</sup>* Mice

File Name: **Supplementary Data 6**

Description: TOPPFUN Analysis of Differentially Expressed Genes from Implantation Sites of LIF-replaced *Pgr<sup>Cre/+</sup>Foxa2<sup>ff</sup>* and Control Mice on GD 6

File Name: **Supplementary Data 7**

Description: Differentially Expressed Genes from GD 4 and GD 6 in Control Mice

File Name: **Supplementary Data 8**

Description: Differentially Expressed Genes from GD 4 and GD 6 in *Pgr<sup>Cre/+</sup>Foxa2<sup>ff</sup>* Mice

File Name: **Supplementary Data 9**

Description: TOPPFUN Analysis of Genes Increased in Uteri from GD 4 to GD 6 in Control Mice

File Name: **Supplementary Data 10**

Description: TOPPFUN Analysis of Genes Decreased in Uteri from GD 4 to GD 6 in Control Mice

File Name: **Supplementary Data 11**

Description: TOPPFUN Analysis of Genes Increased from GD 4 to GD 6 in *Pgr<sup>Cre/+</sup>Foxa2<sup>ff</sup>* Mice

File Name: **Supplementary Data 12**

Description: TOPPFUN Analysis of Genes Decreased from GD 4 to GD 6 in *Pgr<sup>Cre/+</sup>Foxa2<sup>ff</sup>* Mice

File Name: **Supplementary Data 13**

Description: Genes Increased in Uteri of LIF-replaced *Pgr<sup>Cre/+</sup>Foxa2<sup>ff</sup>* Mice, but Declined in the Uteri of Control Mice Between GD 4 and GD 6

File Name: **Supplementary Data 14**

Description: TOPPFUN Analysis of Genes Increased in Uteri of LIF-replaced *Pgr<sup>Cre/+</sup>Foxa2<sup>ff</sup>* Mice, but Declined in the Uteri of Control Mice Between GD 4 and GD 6
