# Supplementary material for: Uterine glands coordinate on-time embryo implantation and impact endometrial decidualization for pregnancy success
Source: Nat Commun. 2018 Jun 22;9:2435. doi: 10.1038/s41467-018-04848-8 (PMC6015089; doi:10.1038/s41467-018-04848-8)
Supplement: Supplementary file 1 — Supplementary Information [file 41467_2018_4848_MOESM1_ESM.pdf]

## **Supplementary Information**

Kelleher et al. Uterine glands coordinate on-time embryo implantation and stromal cell decidualization for pregnancy success

Contents:

Supplementary Tables 1 and 2

Supplementary Figures 1-4

**Supplementary Table 1.** List of Predicted Ligand and Receptor Pairs on GD 4 and their Expression Patterns

| Ligand-Receptor      | Average FPKM |                                               |                                               |          |                                               |                                               |
|----------------------|--------------|-----------------------------------------------|-----------------------------------------------|----------|-----------------------------------------------|-----------------------------------------------|
|                      | Ligand       |                                               |                                               | Receptor |                                               |                                               |
|                      | Control      | <i>Ltf<sup>Cre/+</sup>Foxa2<sup>f/f</sup></i> | <i>Pgr<sup>Cre/+</sup>Foxa2<sup>f/f</sup></i> | Control  | <i>Ltf<sup>Cre/+</sup>Foxa2<sup>f/f</sup></i> | <i>Pgr<sup>Cre/+</sup>Foxa2<sup>f/f</sup></i> |
| <i>Fn1_Cd44</i>      | 161.28       | 127.03                                        | 84.93                                         | 17.10    | 16.47                                         | 13.21                                         |
| <i>Fn1_Itga4</i>     | 161.28       | 127.03                                        | 84.93                                         | 2.13     | 2.34                                          | 1.61                                          |
| <i>Fn1_Itga5</i>     | 161.28       | 127.03                                        | 84.93                                         | 50.79    | 42.56                                         | 32.43                                         |
| <i>Fn1_Itga6</i>     | 161.28       | 127.03                                        | 84.93                                         | 23.93    | 19.00                                         | 18.69                                         |
| <i>Fn1_Itga8</i>     | 161.28       | 127.03                                        | 84.93                                         | 3.04     | 3.54                                          | 2.35                                          |
| <i>Fn1_Itgb8</i>     | 161.28       | 127.03                                        | 84.93                                         | 7.30     | 9.17                                          | 4.54                                          |
| <i>Fn1_Nt5e</i>      | 161.28       | 127.03                                        | 84.93                                         | 6.29     | 5.89                                          | 2.83                                          |
| <i>Fn1_Tmprss6</i>   | 161.28       | 127.03                                        | 84.93                                         | 0.35     | 0.24                                          | 0.35                                          |
| <i>Fn1_Tnfrsf11b</i> | 161.28       | 127.03                                        | 84.93                                         | 4.54     | 2.97                                          | 5.28                                          |
| <i>Hp_Asgr1</i>      | 1.28         | 3.54                                          | 0.28                                          | 0.01     | 0.02                                          | 0.05                                          |
| <i>Hp_Itgam</i>      | 1.28         | 3.54                                          | 0.28                                          | 2.11     | 1.74                                          | 0.99                                          |
| <i>Hp_Itgb2</i>      | 1.28         | 3.54                                          | 0.28                                          | 7.65     | 10.01                                         | 3.21                                          |
| <i>Lama2_Itga1</i>   | 13.98        | 11.98                                         | 7.22                                          | 11.64    | 11.18                                         | 8.92                                          |
| <i>Lama2_Itga6</i>   | 13.98        | 11.98                                         | 7.22                                          | 23.93    | 19.00                                         | 18.69                                         |
| <i>Lama2_Itga7</i>   | 13.98        | 11.98                                         | 7.22                                          | 10.56    | 10.37                                         | 10.38                                         |
| <i>Lama2_Itgb4</i>   | 13.98        | 11.98                                         | 7.22                                          | 7.78     | 10.05                                         | 9.03                                          |
| <i>Sema3C_Nrp1</i>   | 29.73        | 29.87                                         | 17.61                                         | 7.70     | 5.83                                          | 6.30                                          |
| <i>Ntn1_Neo1</i>     | 16.18        | 8.40                                          | 8.48                                          | 20.31    | 21.03                                         | 14.95                                         |
| <i>Rgmb_Neo1</i>     | 20.77        | 20.84                                         | 15.36                                         | 20.31    | 21.03                                         | 14.95                                         |
| <i>Wnt5a_Mcam</i>    | 28.46        | 29.63                                         | 28.91                                         | 77.57    | 67.14                                         | 89.80                                         |

\*The gene symbols of ligand-receptor pairs are shown in first the column. The mean read counts of ligand and corresponding receptor are shown in the subsequent columns.

**Supplementary Table 2.** Antibody information

| Antibody       | Type       | Manufacturer             | Catalog no. | Dilution | Application <sup>2</sup> |
|----------------|------------|--------------------------|-------------|----------|--------------------------|
| CDH1           | Rabbit IgG | Thermo Fisher Scientific | ECCD-2      | 1:400    | IF                       |
| CK8            | Rat IgG    | DSHB <sup>1</sup>        | -           | 1:50     | IF                       |
| CLDN1          | Rabbit IgG | Thermo Fisher Scientific | MH25        | 1:600    | IF                       |
| FOXA2          | Rabbit IgG | Abcam                    | ab108422    | 1:1000   | IF                       |
| Ki67           | Rabbit IgG | Abcam                    | ab15580     | 1:1000   | IF                       |
| p-Tyr705 STAT3 | Rabbit IgG | Bioworld Technology      | BS4181      | 1:300    | IF                       |
| PTGS2          | Rabbit IgG | Cayman Chemicals         | 160106      | 1:250    | IF/IHC                   |

<sup>1</sup>DSHB, University of Iowa Developmental Studies Hybridoma Bank

<sup>2</sup>IF, immunofluorescence; IHC, immunohistochemistry;

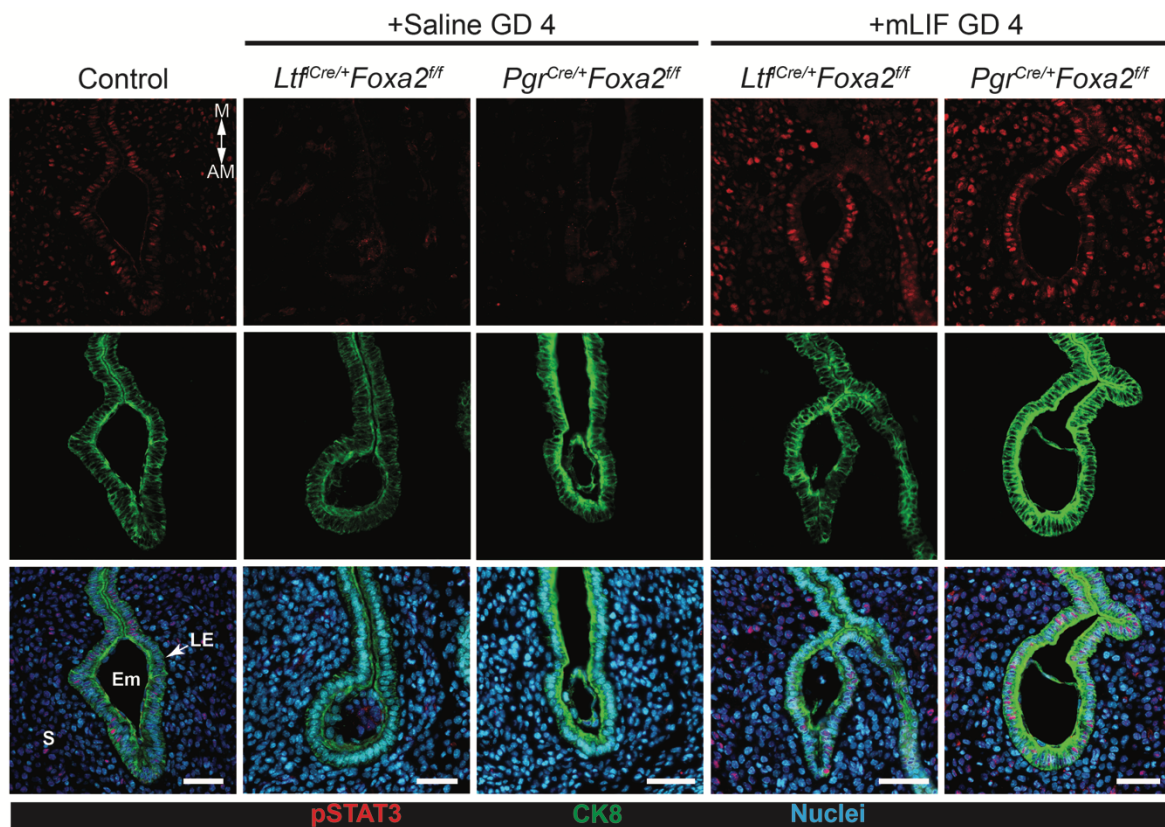

**Supplementary Figure 1 | Effects of LIF on STAT3 localization in implantation sites on GD 4.** Treatment with LIF elicited an increased in pSTAT3 levels in the LE and stroma in both types of FOXA2-deficient mice. Scale bar: 50  $\mu$ m. AM antimesometrial, M mesometrial, Em embryo, LE luminal epithelium, S stroma. All images are representative of three independent experiments.

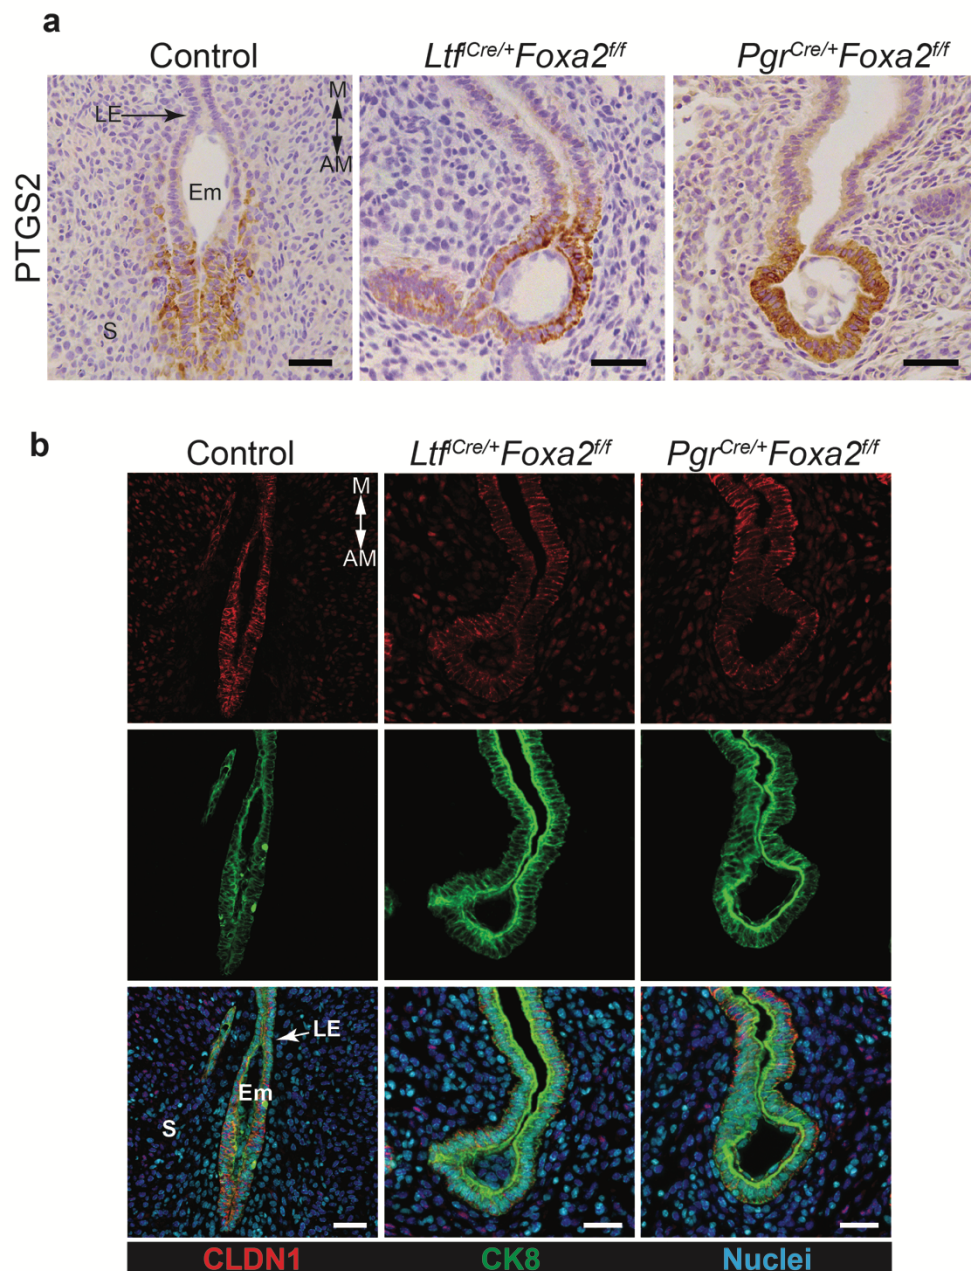

**Supplementary Figure 2 | Assessment of epithelial remodeling and stromal cell decidualization on GD 5 in FOXA2-deficient mice without LIF repletion. a,** Immunolocalization of PTGS2 at 0900 h on GD 5 in implantation sites from control and FOXA2-deficient mice. Note that PTGS2 is present in the decidualizing stroma of control mice but is only in the LE adjacent to the blastocyst in FOXA2-deficient mice. Scale bar: 100  $\mu$ m. **b,** Immunofluorescence analysis of CLDN1 in implantation sites. Scale bar: 50  $\mu$ m. AM antimesometrial, M mesometrial, Em embryo, LE luminal epithelium, S stroma. All images are representative of three independent experiments.

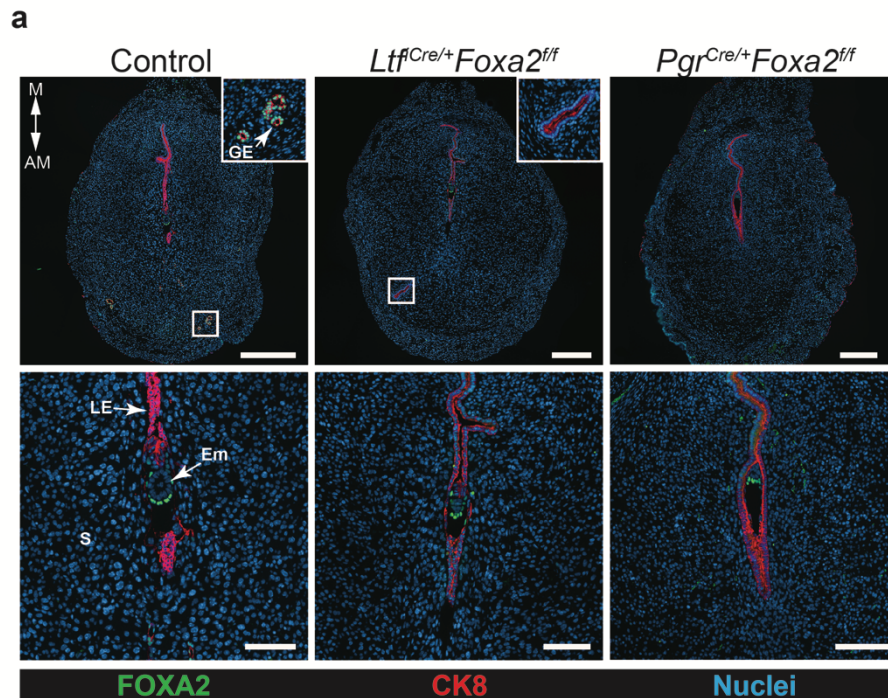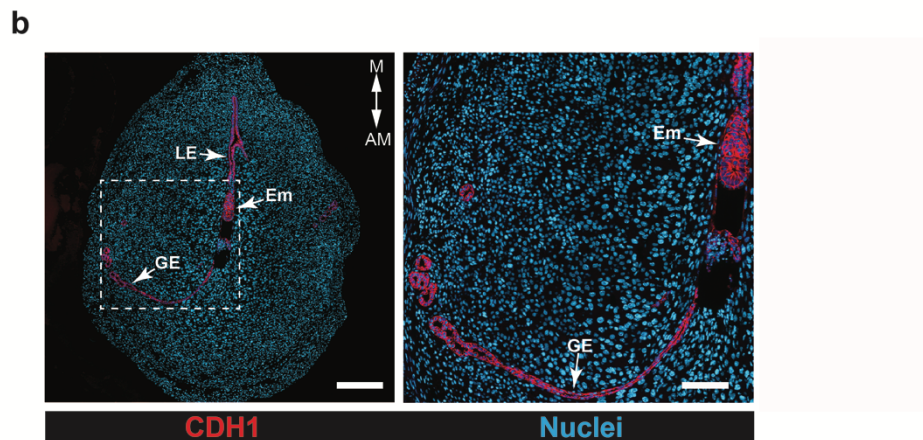

### Supplementary Figure 3 | Uterine glands are present in the implantation site on GD

**5. a,** Immunoreactive distribution of FOXA2 in implantation sites on GD 5 at 2000 h. FOXA2-deficient mice received i.p. injections of LIF on GD 4. Note nuclear FOXA2 in the glands and embryonic endoderm in control mice, but no FOXA2 in the CK8-positive glands in  $Ltf^{Cre/+}Foxa2^{ff}$  mice. Row 1- Scale bar: 250  $\mu$ m; Row 2- Scale bar: 100  $\mu$ m. Em embryo, GE glandular epithelium, LE luminal epithelium. **b,** Immunofluorescence analysis of CDH1 in control mice demonstrates that glands directly connect into the implantation chamber. Left panel- Scale bar: 250  $\mu$ m; Right panel- Scale bar: 100  $\mu$ m. AM antimesometrial, M mesometrial, Em embryo, GE glandular epithelium, LE luminal epithelium. All images are representative of three independent experiments.

Differentially Expressed Genes from Uteri of Glandless *Pgr<sup>Cre/+</sup>Foxa2<sup>fl/fl</sup>*  
and Control Mice from GD 4 vs GD 6

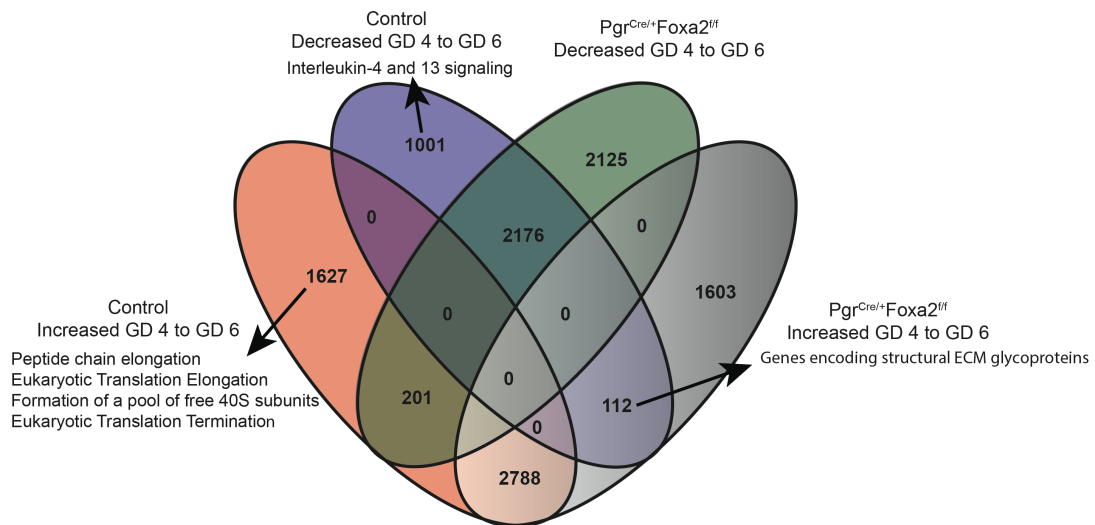

**Supplementary Figure 4 | Venn diagrams of differentially expressed genes in uteri of LIF-repleted glandless *Pgr<sup>Cre/+</sup>Foxa2<sup>fl/fl</sup>* and control mice from GD 4 and GD 6.** Selected pathways enriched in the gene sets were determined by functional analysis.
